# Supplementary material for: Rational synthesis of carbon-coated hollow Ge nanocrystals with enhanced lithium-storage properties
Source: Royal Society of Chemistry journal article supplement (doi:10.1039/c6nr00937a), 2016-01-01
Supplement: c6nr00937a1.pdf [file c6nr00937a1.pdf]

***Electronic Supplementary Information***

**Rational synthesis of carbon-coated hollow Ge nanocrystals with enhanced lithium-storage properties**

*Wei Zhang, Xiaoqing Chu, Chaoji Chen, Jingwei Xiang, Xiaoxiao Liu, Yunhui Huang and Xianluo Hu\**

State Key Laboratory of Materials Processing and Die & Mould Technology, School of Materials Science and Engineering, Huazhong University of Science and Technology, Wuhan 430074, China

E-mail: huxl@mail.hust.edu.cn

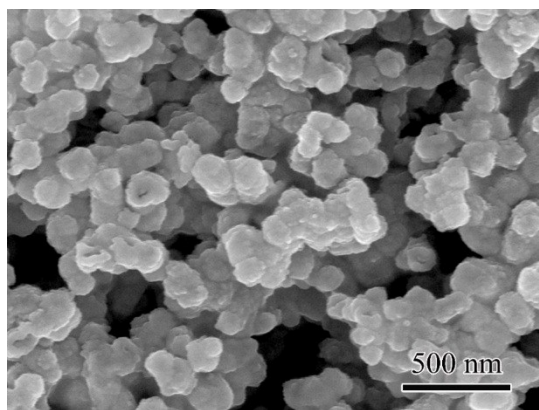

**Fig. S1** FE-SEM image of solid Ge particles prepared at the absence of THF.

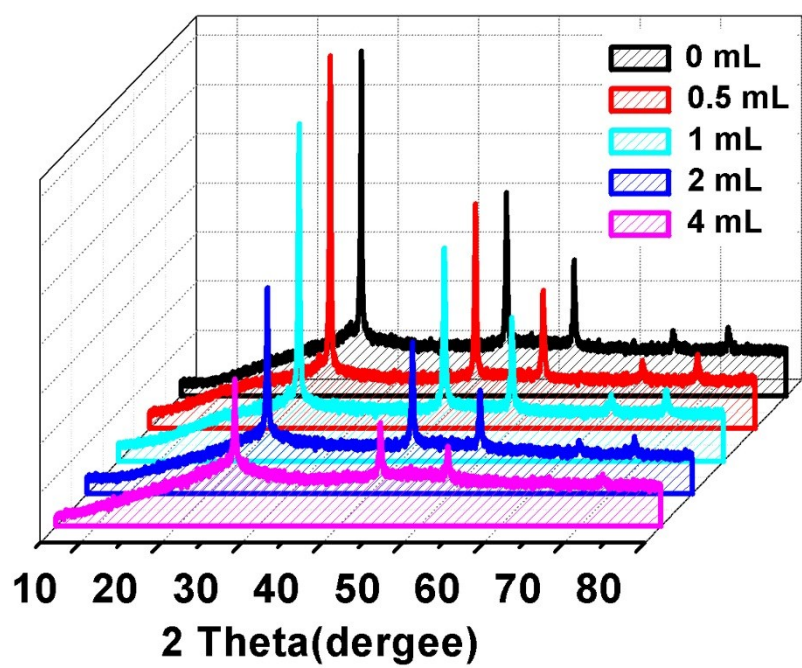

**Fig. S2** XRD patterns for the Ge products prepared in the presence of different amounts of THF (0, 0.5, 1, 2, and 4 mL).

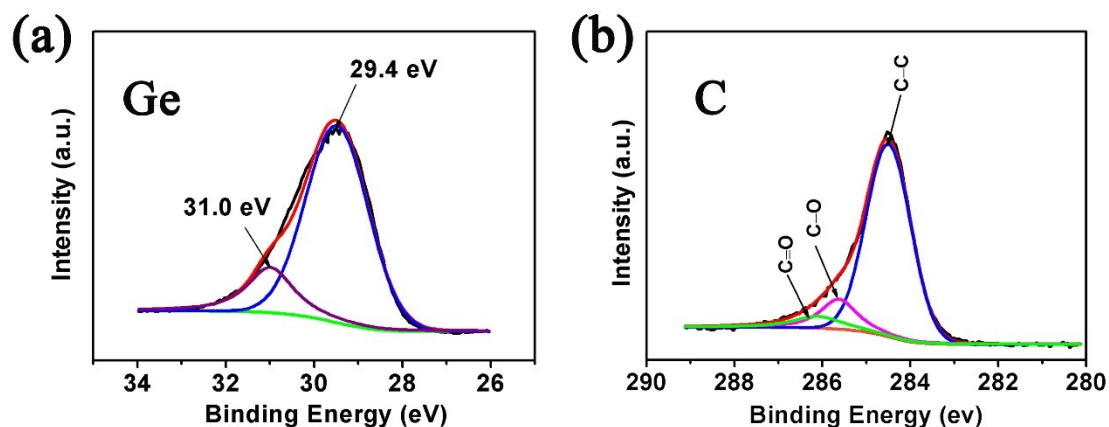

**Fig. S3** XPS spectra of the hollow Ge@C hybrid: (a) high-resolution spectrum of Ge 3d and (b) C 1s. The binding energy at 29.4 eV is assigned to Ge (0) and a trace of Ge (II) at 31.0 eV appears. The Ge (IV) signal at 32.6 eV was not found.<sup>[1]</sup> The existence of Ge (II) may be resulted from the partially oxidized Ge in air. Both the Ge 3d and C 1s XPS spectra suggest that the Ge@C product is mainly made of Ge<sup>0</sup> and carbon with a negligible content of Ge (II).

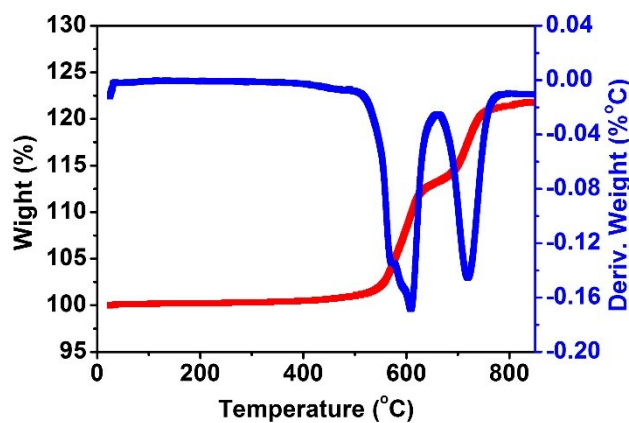

**Fig. S4** TG curves of the hollow Ge@C composite obtained at a heating rate of 5 °C min<sup>-1</sup>. The composite contains 84.5 wt% Ge and 15.5 wt% C, based on the weight loss upon carbon combustion and complete oxidation of Ge into GeO<sub>2</sub> in air.

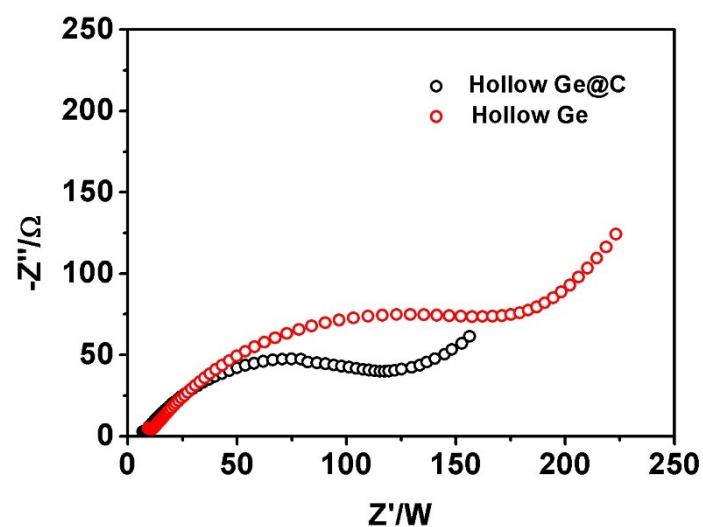

**Fig. S5** Electrochemical impedance spectra of the hollow Ge and hollow Ge@C electrodes.

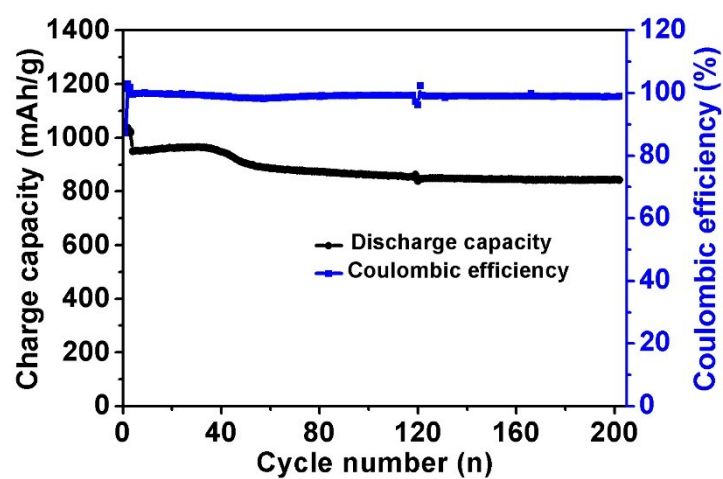

**Fig. S6** Cycling performance and coulombic efficiency of the hollow Ge@C electrode at 500 mA  $g^{-1}$  in a potential window of 0.01–3.0 V.

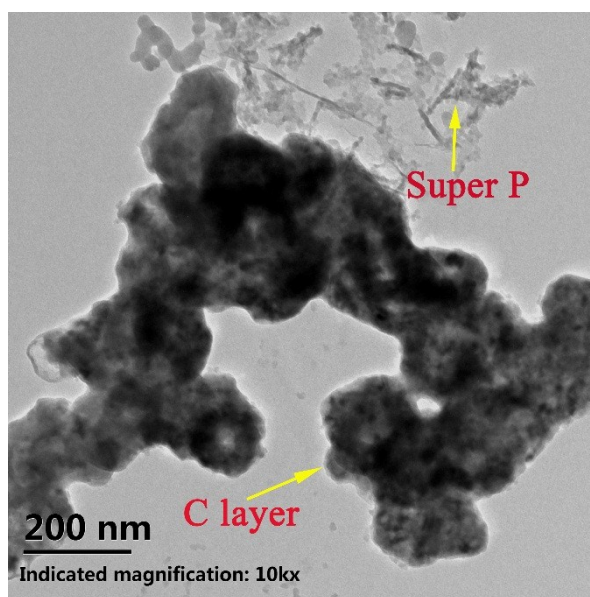

**Fig. S7** TEM image of hollow Ge@C electrode after 200 charge/discharge cycles at 500 mA g<sup>-1</sup>.

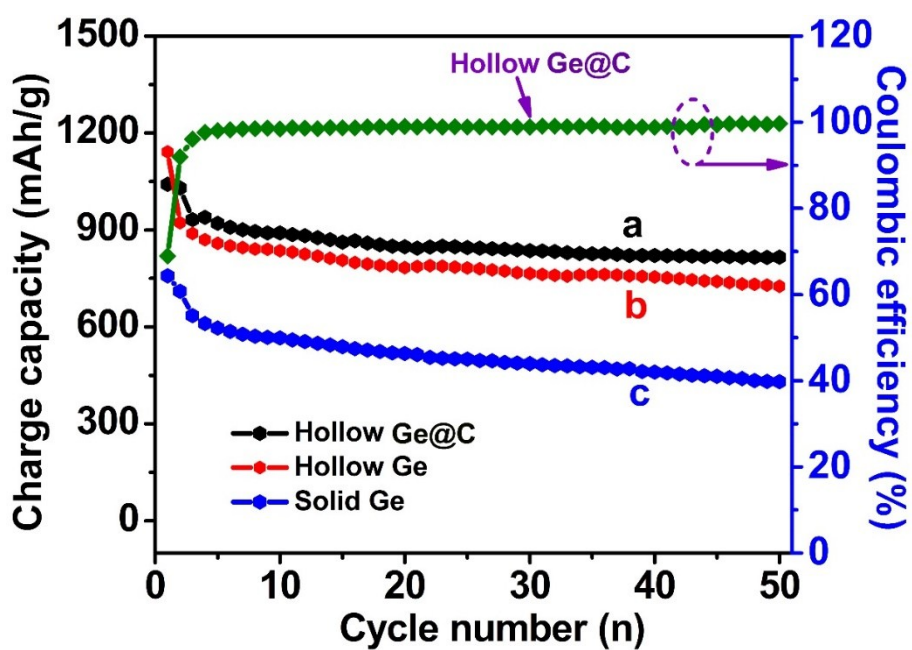

**Fig. S8** Discharge/charge capacity and Coulombic efficiency versus cycle number for half-cells of made of solid Ge, hollow Ge nanospheres, and hollow Ge@C nanospheres at a current density of 1000 mA g<sup>-1</sup>.

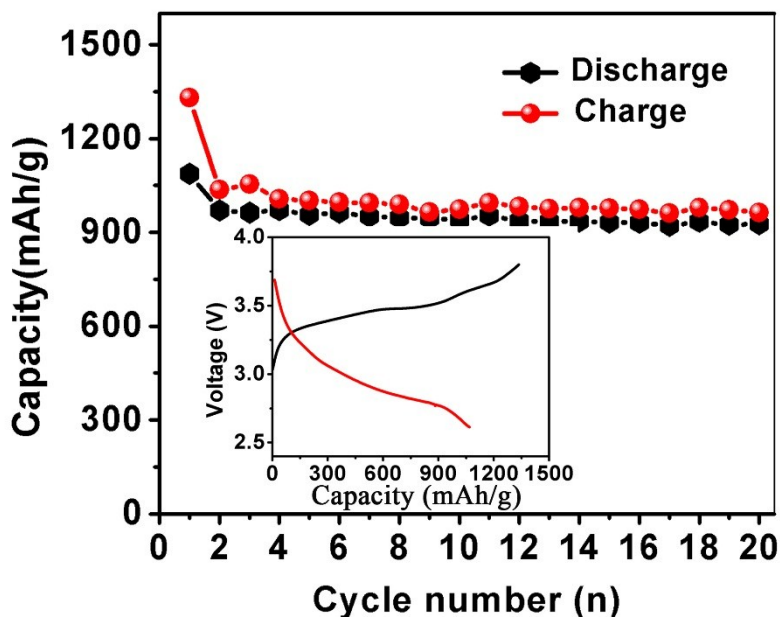

**Fig. S9.** Electrochemical performance of the CR-2032 coin-type full cell containing an anode made of hollow Ge@C nanospheres and a cathode made of LiCoO<sub>2</sub>. C-rate: 100 mA g<sup>-1</sup>; Inset: the first charge/discharge curve. Before assembling the Li-ion cell, the Ge@C electrode was pre-lithiated according to the previous literature to eliminate the irreversible capacity loss during the first formation cycle.<sup>[2,3]</sup> The specific capacity of the anode/cathode was controlled at about 1:1.2 according to the mass of both active materials. To evaluate the performance of the anode material, the full cells here are anode-limited and the specific capacity was evaluated based on the anode.

#### References:

- [1] M. M. Bentlohner, M. Waibel, P. Zeller, K. Sarkar, P. M. Buschbaum, D. F. Rohlffing, T. F. Fässler, *Angew. Chem. Int. Ed.* 2014, **126**, 9187; *Angew. Chem.* 2014, **53**, 9041.
- [2] D. T. Ngo, H. T. T. Le, C. Kim, J. Y. Lee, J. G. Fisher, I.D. Kim, C. J. Park, *Energy Environ. Sci.*, 2015, **8**, 3577.
- [3] C. Chae, H. J. Noh, J. K. Lee, B. Scrosati, Y. K. Sun, *Adv. Funct. Mater.* 2014, **24**, 3036.
